# Supplementary material
Source: publisher figshare collection journal article supplement (https://geolsoc.figshare.com/ndownloader/files/27798972)
Supplement: Supplementary file 1 [file 27798972]

	Identification		Weighting		Argon Measurements								Major Element Determinations				Calculations
	Sample ID	Replicates	Mass [mg]	error	40Ar* [ppb]	error	36Ar [ppb]	error	36Ar/38Ar	error	40Ar atm [%]	error	K2O [%]	K [%]	TiO2 [%]	LOI [%]	Age ± error [Ma]
	DCE-02	#1	4.366	0.001	1.8	0.2	0.003247	2.65	10.0	20	35	7	0.95	0.79	1.25	0.63	32 ± 5
		#2	5.514	0.002	4.0	0.3	0.010964	1.65	5.0	2	45	3	0.95	0.79	1.25	0.63	71 ± 8
		#3	6.311	0.002	2.2	0.3	0.003630	3.27	0.4	0.2	33	9	0.95	0.79	1.25	0.63	40 ± 7
		#4	6.150	0.001	1.5	0.1	0.002827	2.26	6.0	7	36	6	0.95	0.79	1.25	0.63	27 ± 4
		#5	6.303	0.001	1.5	0.2	0.005667	4.44	7.0	6	53	8	0.95	0.79	1.25	0.63	26 ± 6
	Median																32
	Weighted Average Age																29 ± 5
	DCE-03	#1	4.300	0.001	4.9	0.2	0.003603	0.92	10.0	30	18	4	1.07	0.89	1.3	0.81	78 ± 7
		#2	5.559	0.002	4.8	0.4	0.006568	1.85	3.0	2	29	5	1.07	0.89	1.3	0.81	80 ± 10
		#3	5.574	0.001	3.0	0.2	0.005412	1.60	5.0	3	35	4	1.07	0.89	1.3	0.81	48 ± 5
		#4	6.445	0.001	1.4	0.3	0.007336	5.18	4.0	1	61	8	1.07	0.89	1.3	0.81	22 ± 5
		#5	5.614	0.001	2.7	0.3	0.012491	2.62	6.0	2	58	4	1.07	0.89	1.3	0.81	43 ± 6
	Median																48
	Weighted Average Age																n.c.
	DCE-04	#1	4.483	0.001	8.0	0.2	0.007124	0.62	5.0	2	21	2	1.72	1.43	3.55	0.92	79 ± 6
		#2	5.533	0.001	8.0	0.3	0.009416	0.82	6.0	4	26	2	1.72	1.43	3.55	0.92	79 ± 7
		#3	6.259	0.001	14.0	0.3	0.014408	0.49	3.5	0.7	24	1	1.72	1.43	3.55	0.92	136 ± 9
		#4	5.198	0.001	10.9	0.3	0.007479	0.64	7.0	4	17	2	1.72	1.43	3.55	0.92	107 ± 8
		#5	5.104	0.001	6.7	0.2	0.008302	0.74	7.0	5	27	2	1.72	1.43	3.55	0.92	66 ± 6
	Median																79
	Weighted Average Age																n.c.
	DCE-05	#1	4.317	0.001	14.0	0.3	0.001451	0.36	2.0	3	3	2	1.61	1.34	3.12	1.25	140 ± 10
		#2	5.973	0.001	7.7	0.3	0.003188	0.63	10.0	10	11	3	1.61	1.34	3.12	1.25	81 ± 8
		#3	5.373	0.002	10.6	0.3	0.001098	0.36	0.0	20	3	2	1.61	1.34	3.12	1.25	110 ± 9
	Median																110
	Weighted Average Age																n.c.
	DCE-07	#1	5.096	0.001	18.4	0.2	0.001645	0.22	0.0	2000	3	1	2.1	1.74	3.1	0.72	146 ± 9
		#2	4.076	0.002	19.5	0.5	0.002722	0.54	20.0	80	4	1	2.1	1.74	3.1	0.72	150 ± 10
		#3	4.779	0.001	13.8	0.5	0.002433	0.65	4.0	8	5	3	2.1	1.74	3.1	0.72	111 ± 9
	Median																146
	Weighted Average Age																72.6 ± 9.5
	DCE-08	#1	4.392	0.001	15.0	0.2	0.002148	0.23	0.0	200	4	1	2.01	1.67	3.1	0.52	125 ± 7
		#2	5.102	0.001	28.6	0.6	0.006116	0.66	5.0	5	6	1	2.01	1.67	3.1	0.52	230 ± 20
		#3	4.127	0.001	18.0	0.7	0.007453	1.03	10.0	10	11	3	2.01	1.67	3.1	0.52	150 ± 10
		#4	5.095	0.001	8.5	0.2	0.001499	0.30	2.0	4	5	2	2.01	1.67	3.1	0.52	72 ± 5
		#5	4.304	0.001	13.0	0.3	0.001815	0.38	10.0	20	4	2	2.01	1.67	3.1	0.52	109 ± 8
	Median																125
	Weighted Average Age																n.c.
	DCE-09	#1	4.118	0.001	8.8	0.2	0.018069	0.58	7.0	3	38	1	1.89	1.57	3.09	0.75	79 ± 5
		#2	4.844	0.002	8.6	0.2	0.014190	0.53	5.0	1	33	1	1.89	1.57	3.09	0.75	77 ± 5
		#3	4.203	0.001	8.2	0.2	0.011773	0.80	6.0	2	30	2	1.89	1.57	3.09	0.75	73 ± 6
		#4	3.367	0.001	9.3	0.5	0.013352	1.40	5.0	2	30	3	1.89	1.57	3.09	0.75	84 ± 8
		#5	5.373	0.002	11.1	0.3	0.015937	0.60	5.0	1	30	1	1.89	1.57	3.09	0.75	99 ± 7
	Median																79
	Weighted Average Age																78 ± 5.8
	DCE-10	#1	5.172	0.001	7.1	0.3	0.002352	0.57	10.0	20	9	3	1.57	1.3	3.8	0.52	77 ± 7
		#2	6.523	0.002	9.1	0.2	0.005380	0.35	6.0	4	15	1	1.57	1.3	3.8	0.52	98 ± 8
		#3	4.254	0.002	5.4	0.4	0.003971	1.30	3.0	4	18	5	1.57	1.3	3.8	0.52	59 ± 7
		#4	5.303	0.001	10.3	0.3	0.005617	0.58	10.0	10	14	2	1.57	1.3	3.8	0.52	110 ± 9
		#5	5.573	0.001	4.1	0.3	0.001526	0.90	0.0	10	10	6	1.57	1.3	3.8	0.52	44 ± 6
	Median																77
	Weighted Average Age																n.c.
	DCE-11	#1	4.208	0.001	6.3	0.2	0.001835	0.44	2.0	3	8	3	1.88	1.56	3.32	0.41	57 ± 5
		#2	4.348	0.001	9.5	0.2	0.009506	0.43	5.0	2	23	1	1.88	1.56	3.32	0.41	86 ± 6
		#3	4.799	0.002	19.8	0.4	0.010798	0.54	5.0	2	14	1	1.88	1.56	3.32	0.41	170 ± 10
		#4	5.424	0.001	6.4	0.2	0.002382	0.40	100.0	900	10	2	1.88	1.56	3.32	0.41	58 ± 5
		#5	5.713	0.001	8.0	0.4	0.002017	0.68	10.0	10	7	4	1.88	1.56	3.32	0.41	72 ± 7
	Median																72
	Weighted Average Age																n.c.
	DCE-12A	#1	4.092	0.001	9.3	0.2	0.001989	0.32	2.0	2	6	2	1.81	1.5	3.54	1.33	88 ± 6
		#2	3.980	0.003	13.3	0.4	0.003874	0.56	5.0	8	8	2	1.81	1.5	3.54	1.33	120 ± 10
		#3	4.044	0.001	13.4	0.4	0.003904	0.56	2.0	1	8	2	1.81	1.5	3.54	1.33	120 ± 10
	Median																120
	Weighted Average Age																120 ± 10
	DCE-13	#1	5.100	0.001	4.1	0.2	0.010792	1.52	6.0	2	44	3	0.56	0.46	0.93	1.22	120 ± 10
		#2	5.124	0.001	4.0	0.3	0.010964	2.10	5.0	2	45	4	0.56	0.46	0.93	1.22	120 ± 10
		#3	5.230	0.002	5.1	0.3	0.013424	1.62	5.0	2	44	3	0.56	0.46	0.93	1.22	150 ± 10
	Median																120
	Weighted Average Age																120 ± 10
	DCE-14	#1	4.232	0.001	14.0	0.3	0.007008	0.56	4.0	2	13	2	2.33	1.9	3.14	0.66	103 ± 8
		#2	4.600	0.001	17.0	0.4	0.009271	0.68	6.0	6	14	2	2.33	1.9	3.14	0.66	120 ± 10
		#3	5.171	0.001	14.4	0.2	0.015234	0.44	5.0	1	24	1	2.33	1.9	3.14	0.66	106 ± 7
	Median																106
	Weighted Average Age																109.2 ± 8.2
	DCE-15	#1	4.780	0.001	6.2	0.3	0.002567	0.85	2.0	2	11	5	0.97	0.81	1.19	0.94	110 ± 10
		#2	6.652	0.001	3.8	0.2	0.006855	1.25	10.0	20	35	3	0.97	0.81	1.19	0.94	66 ± 7
		#3	5.696	0.001	7.0	0.3	0.010050	1.20	7.0	5	30	3	0.97	0.81	1.19	0.94	120 ± 10
	Median																110
	Weighted Average Age																115.2 ± 10
	DCE-16	#1	4.919	0.001	1.4	0.1	0.002999	2.44	10.0	20	39	6	1.21	1	1.35	1.16	20 ± 3
		#2	4.876	0.001	8.1	0.3	0.016632	1.06	4.0	1	38	2	1.21	1	1.35	1.16	110 ± 10
		#3	5.691	0.001	4.4	0.2	0.015342	1.73	6.0	3	51	3	1.21	1	1.35	1.16	63 ± 6
		#4	6.171	0.002	2.2	0.1	0.016405	1.48	8.0	4	69	2	1.21	1	1.35	1.16	31 ± 4
		#5	6.008	0.001	3.6	0.2	0.004690	1.32	7.0	4	28	4	1.21	1	1.35	1.16	51 ± 5
	Median																51
	Weighted Average Age																n.c.
	DCE-17	#1	4.821	0.002	4.0	0.2	0.001827	0.80	10.0	30	12	5	1.07	0.89	1.28	0.97	64 ± 6
		#2	5.347	0.001	8.6	0.2	0.009604	0.70	8.0	6	25	2	1.07	0.89	1.28	0.97	130 ± 10
		#3	5.446	0.001	4.2	0.2	0.008624	1.34	5.0	3	38	3	1.07	0.89	1.28	0.97	66 ± 7
		#4	5.706	0.001	1.2	0.3	0.001005	4.30	10.0	30	20	20	1.07	0.89	1.28	0.97	20 ± 5
		#5	6.494	0.001	3.9	0.2	0.001782	0.68	0.0	300	12	4	1.07	0.89	1.28	0.97	61 ± 6
	Median																64
	Weighted Average Age																63.6 ± 6.3
	DCE-18	#1	4.321	0.002	11.0	0.3	0.000752	0.34	1.0	2	2	2	1.64	1.36	3.54	0.59	113 ± 8
		#2	5.382	0.001	11.3	0.4	0.006163	0.82	4.0	3	14	3	1.64	1.36	3.54	0.59	120 ± 10
		#3	4.859	0.001	10.8	0.2	0.012060	0.45	5.0	2	25	1	1.64	1.36	3.54	0.59	111 ± 8
	Median																113
	Weighted Average Age																114.4 ± 8.6
	DCE-19.1	#1	4.071	0.002	12.3	0.3	0.036541	0.77	7.0	2	47	1	2.48	2.1	2.97	1.43	84 ± 6
		#2	5.055	0.001	12.3	0.3	0.033714	0.75	5.1	0.7	45	1	2.48	2.1	2.97	1.43	83 ± 6
		#3	5.678	0.002	10.7	0.4	0.034440	1.38	5.0	1	49	2	2.48	2.1	2.97	1.43	72 ± 6
		#4	5.358	0.002	8.5	0.3	0.020620	1.14	5.0	1	42	2	2.48	2.1	2.97	1.43	59 ± 5
		#5	4.013	0.001	7.5	0.4	0.016750	1.60	7.0	5	40	3	2.48	2.1	2.97	1.43	52 ± 5
	Median																72
	Weighted Average Age																80 ± 6
	DCE-19.2	#1	3.996	0.001	12.1	0.3	0.005528	0.54	6.0	7	12	2	2.23	1.85	3.1	0.9	92 ± 6
		#2	5.293	0.001	16.3	0.3	0.017244	0.54	5.0	1	24	1	2.23	1.85	3.1	0.9	123 ± 8
		#3	4.346	0.001	11.6	0.3	0.010330	0.72	5.0	3	21	2	2.23	1.85	3.1	0.9	88 ± 6
		#4	3.985	0.001	13.7	0.3	0.008742	0.46	5.0	3	16	1	2.23	1.85	3.1	0.9	104 ± 7
		#5	6.512	0.001	18.9	0.2	0.009545	0.28	6.0	2	13	1	2.23	1.85	3.1	0.9	141 ± 8
	Median																104
	Weighted Average Age																n.c.
	DCE-20	#1	4.137	0.002	16.6	0.2	0.000562	0.21	1.0	1	1	1	2.12	1.76	3.07	1.42	131 ± 8
		#2	4.274	0.001	17.5	0.4	0.006514	0.60	6.0	5	10	2	2.12	1.76	3.07	1.42	140 ± 10
		#3	5.720	0.002	15.9	0.3	0.007959	0.43	5.0	4	13	1	2.12	1.76	3.07	1.42	126 ± 8
	Median																131
	Weighted Average Age																132 ± 8.6
	DCE-21	#1	5.179	0.001	3.5	0.2	0.003307	1.08	3.0	2	22	4	1.02	0.85	1.21	0.83	58 ± 6
		#2	5.871	0.002	4.7	0.2	0.006431	1.07	4.0	2	29	3	1.02	0.85	1.21	0.83	79 ± 7
		#3	5.761	0.002	5.9	0.3	0.005575	0.96	4.0	3	22	3	1.02	0.85	1.21	0.83	98 ± 9
		#4	5.710	0.001	0.9	0.3	0.004523	6.30	6.0	7	60	10	1.02	0.85	1.21	0.83	16 ± 5
		#5	6.402	0.001	1.5	0.3	0.002154	3.30	10.0	10	30	10	1.02	0.85	1.21	0.83	25 ± 6
	Median																58
	Weighted Average Age																n.c.
	DCE-22	#1	4.635	0.002	7.5	0.3	0.002185	0.54	10.0	10	8	3	1.14	0.95	1.32	0.85	110 ± 10
		#2	4.603	0.001	5.6	0.3	0.006939	1.11	7.0	7	27	3	1.14	0.95	1.32	0.85	83 ± 8
		#3	4.734	0.002	7.2	0.2	0.009380	0.76	4.0	3	28	2	1.14	0.95	1.32	0.85	106 ± 9
		#4	6.607	0.001	6.5	0.2	0.004460	0.54	7.0	9	17	2	1.14	0.95	1.32	0.85	96 ± 8
		#5	6.394	0.001	6.7	0.3	0.002220	0.66	10.0	20	9	4	1.14	0.95	1.32	0.85	100 ± 10
	Median																100
	Weighted Average Age																103 ± 9.2
	DCE-23	#1	4.224	0.001	12.2	0.3	0.006653	0.58	5.0	4	14	2	1.94	1.61	3.05	0.7	106 ± 8
		#2	5.096	0.001	14.0	0.3	0.010295	0.48	8.0	7	18	1	1.94	1.61	3.05	0.7	121 ± 8
		#3	5.205	0.002	13.0	0.3	0.012284	0.52	5.0	3	22	1	1.94	1.61	3.05	0.7	113 ± 8
	Median																113
	Weighted Average Age																113.7 ± 8
	DCE-24	#1	4.492	0.003	10.8	0.2	0.004020	0.40	10.0	20	10	2	1.57	1.3	3.12	0.97	116 ± 9
		#2	4.668	0.002	10.8	0.3	0.000738	0.36	2.0	6	2	3	1.57	1.3	3.12	0.97	120 ± 10
		#3	4.559	0.001	9.3	0.3	0.002709	0.54	3.0	3	8	3	1.57	1.3	3.12	0.97	100 ± 9
	Median																116
	Weighted Average Age																117.9 ± 9.5
	DCE-25	#1	4.795	0.002	5.9	0.2	0.003765	0.68	0.0	100	16	3	1.87	1.55	3.03	0.41	54 ± 5
		#2	4.185	0.001	12.1	0.4	0.010775	0.82	7.0	5	21	2	1.87	1.55	3.03	0.41	109 ± 9
		#3	4.520	0.001	11.9	0.6	0.015503	1.44	4.0	2	28	3	1.87	1.55	3.03	0.41	110 ± 10
	Median																109
	Weighted Average Age																109.5 ± 9.5
	DCE-26	#1	4.234	0.001	7.5	0.3	0.003426	0.66	3.0	2	12	3	2.02	1.68	3.06	0.71	63 ± 5
		#2	4.221	0.001	23.1	0.5	0.013657	0.65	4.0	2	15	1	2.02	1.68	3.06	0.71	190 ± 10
		#3	4.536	0.001	12.4	0.3	0.009744	0.68	9.0	9	19	2	2.02	1.68	3.06	0.71	103 ± 8
		#4	4.087	0.001	6.7	0.2	0.001952	0.44	10.0	30	8	3	2.02	1.68	3.06	0.71	57 ± 5
		#5	3.847	0.001	8.9	0.3	0.001903	0.42	3.0	5	6	2	2.02	1.68	3.06	0.71	75 ± 6
	Median																75
	Weighted Average Age																n.c.
	DCE-27	#1	4.298	0.001	9.3	0.2	0.004249	0.32	5.0	4	12	1	1.98	1.64	3.16	0.58	80 ± 5
		#2	4.694	0.001	16.3	0.3	0.020197	0.57	6.0	3	27	1	1.98	1.64	3.16	0.58	138 ± 9
		#3	5.584	0.001	12.7	0.3	0.010637	0.70	4.0	2	20	2	1.98	1.64	3.16	0.58	108 ± 8
		#4	5.369	0.001	6.4	0.3	0.005029	0.87	4.0	1	19	3	1.98	1.64	3.16	0.58	55 ± 5
		#5	4.841	0.001	12.7	0.4	0.003700	0.56	2.0	2	8	2	1.98	1.64	3.16	0.58	109 ± 8
	Median																108
	Weighted Average Age																n.c.
	DCE-28	#1	4.173	0.001	15.7	0.4	0.013149	0.80	5.0	2	20	2	2.17	1.8	3.06	0.68	122 ± 9
		#2	5.520	0.001	14.0	0.3	0.020973	0.58	6.0	1	30.9	0.9	2.17	1.8	3.06	0.68	109 ± 7
		#3	4.571	0.001	15.6	0.3	0.025741	0.63	6.0	2	33	1	2.17	1.8	3.06		121 ± 8
	Median																121
	Weighted Average Age																117.1 ± 8
	DCE-29A	#1	4.732	0.001	9.9	0.2	0.002496	0.27	4.0	5	7	1	2.24	1.86	2.7	0.98	75 ± 5
		#2	4.159	0.002	16.9	0.4	0.008460	0.53	4.0	3	13	1	2.24	1.86	2.7	0.98	127 ± 9
		#3	5.542	0.001	11.3	0.3	0.007754	0.64	6.0	4	17	2	2.24	1.86	2.7	0.98	86 ± 6
		#4	5.744	0.001	14.5	0.4	0.002024	0.48	4.0	6	4	2	2.24	1.86	2.7	0.98	109 ± 8
		#5	4.377	0.001	15.3	0.3	0.004457	0.38	10.0	10	8	1	2.24	1.86	2.7	0.98	115 ± 8
	Median																109
	Weighted Average Age																n.c.
	DCE-30	#1	4.497	0.003	8.1	0.2	0.004055	0.46	3.0	2	13	2	1.2	1	1.23	0.68	113 ± 8
		#2	4.828	0.001	12.0	0.3	0.013400	0.55	5.0	2	25	1	1.2	1	1.23	0.68	160 ± 10
		#3	5.555	0.001	4.3	0.1	0.010867	0.96	5.0	2	43	2	1.2	1	1.23	0.68	61 ± 5
		#4	6.610	0.001	1.0	0.2	0.002233	4.20	10.0	10	40	10	1.2	1	1.23	0.68	15 ± 4
		#5	6.388	0.001	3.6	0.2	0.002297	1.00	10.0	10	16	5	1.2	1	1.23	0.68	52 ± 6
	Median																61
	Weighted Average Age																n.c.
	DCE-31	#1	4.339	0.002	14.2	0.3	0.000971	0.34	1.0	2	2	2	2.31	1.9	3.1	0.64	105 ± 8
		#2	5.301	0.001	17.1	0.3	0.003592	0.35	10.0	30	5.9	0.9	2.31	1.9	3.1	0.64	125 ± 9
		#3	4.766	0.002	17.6	0.4	0.003763	0.52	4.0	6	6	2	2.31	1.9	3.1	0.64	130 ± 10
	Median																125
	Weighted Average Age																127.4 ± 9.5
	DCE-32A	#1	5.215	0.005	9.5	0.3	0.002767	0.46	3.0	3	8	2	1.93	1.6	2.36	1.13	83 ± 6
		#2	5.861	0.001	7.2	0.3	0.006030	0.70	5.0	4	20	2	1.93	1.6	2.36	1.13	64 ± 5
		#3	4.771	0.001	9.7	0.3	0.004016	0.52	5.0	9	11	2	1.93	1.6	2.36	1.13	85 ± 7
		#4	4.746	0.001	1.1	0.2	0.003685	5.20	3.0	3	50	10	1.93	1.6	2.36	1.13	10 ± 3
		#5	4.425	0.001	4.4	0.4	0.000941	0.82	2.0	3	6	7	1.93	1.6	2.36	1.13	39 ± 5
	Median																64
	Weighted Average Age																n.c.
	DCE-32C	#1	2.038	0.003	29.0	0.9	0.025825	1.32	5.0	2	21	2	3.87	3.2	1.33	0.84	130 ± 10
		#2	2.867	0.002	32.4	0.6	0.023988	0.76	6.0	3	18	1	3.87	3.2	1.33	0.84	140 ± 10
		#3	3.313	0.001	33.5	0.3	0.032396	0.41	6.0	2	22	1	3.87	3.2	1.33	0.84	140 ± 10
	Median																140
	Weighted Average Age																136.8 ± 10
	DCE-33	#1	2.913	0.002	27.4	0.4	0.005859	0.46	10.0	30	6	1	3.89	3.2	1.4	1.66	119 ± 9
		#2	2.480	0.001	34.7	0.8	0.004844	0.84	10.0	10	4	1	3.89	3.2	1.4	1.66	150 ± 10
		#3	2.145	0.001	33.0	0.7	0.005819	0.80	3.0	5	5	2	3.89	3.2	1.4	1.66	140 ± 10
	Median																140
	Weighted Average Age																137 ± 9.7
	DCE-34A	#1	2.996	0.002	11.0	0.4	0.002774	0.61	4.0	6	7	3	2.49	2.1	1.56	1.1	74 ± 6
		#2	3.469	0.001	5.1	0.4	0.000528	0.64	0.0	50	3	8	2.49	2.1	1.56	1.1	35 ± 4
		#3	2.754	0.001	15.6	0.3	0.002178	0.38	2.0	2	4	2	2.49	2.1	1.56	1.1	104 ± 7
		#4	3.368	0.001	6.5	0.4	0.001894	0.80	2.0	3	8	5	2.49	2.1	1.56	1.1	45 ± 5
		#5	3.473	0.002	6.9	0.4	0.001217	0.65	2.0	4	5	5	2.49	2.1	1.56	1.1	47 ± 5
	Median																47
	Weighted Average Age																n.c.
	DCE-34B	#1	3.111	0.001	27.0	0.6	0.010050	0.80	4.0	3	10	2	3.49	2.9	1.61	1.41	130 ± 10
		#2	2.535	0.001	20.6	0.5	0.012179	0.80	3.0	1	15	2	3.49	2.9	1.61	1.41	100 ± 9
		#3	2.670	0.001	21.9	0.6	0.012947	0.90	10.0	10	15	2	3.49	2.9	1.61	1.41	110 ± 10
	Median																110
	Weighted Average Age																120.8 ± 10
	DCE-35	#1	4.820	0.001	16.8	0.2	0.010403	0.32	5.0	2	16	1	2.05	1.7	1.98	0.5	137 ± 9
		#2	4.251	0.001	15.9	0.4	0.000538	0.42	1.0	4	1	2	2.05	1.7	1.98	0.5	130 ± 10
		#3	4.266	0.001	14.0	0.4	0.001954	0.48	10.0	60	4	2	2.05	1.7	1.98	0.5	115 ± 9
	Median																130
	Weighted Average Age																133.8 ± 9.5
	DCE-36.1	#1	4.028	0.001	17.5	0.5	0.020598	1.02	4.0	1	26	2	2.11	1.75	3.36	0.66	140 ± 10
		#2	4.330	0.001	14.1	0.3	0.008997	0.62	4.0	2	16	2	2.11	1.75	3.36	0.66	112 ± 8
		#3	4.442	0.001	14.1	0.3	0.011080	0.49	4.0	1	19	1	2.11	1.75	3.36	0.66	112 ± 8
	Median																112
	Weighted Average Age																112 ± 8
	DCE-36.2	#1	4.328	0.001	12.0	0.5	0.011339	1.16	4.0	1	22	3	1.89	1.57	3.42	0.8	110 ± 10
		#2	3.710	0.001	19.1	0.4	0.003368	0.50	3.0	5	5	2	1.89	1.57	3.42	0.8	170 ± 10
		#3	3.900	0.001	12.1	0.4	0.001689	0.52	3.0	6	4	3	1.89	1.57	3.42	0.8	108 ± 9
	Median																110
	Weighted Average Age																109.0 ± 9.5
	DCE-37	#1	5.766	0.001	15.5	0.4	0.034618	0.80	5.5	0.8	40	1	1.98	1.64	3.54	0.69	131 ± 9
		#2	4.224	0.001	15.1	0.4	0.007559	0.66	3.0	2	13	2	1.98	1.64	3.54	0.69	128 ± 9
		#3	4.277	0.001	16.6	0.4	0.012207	0.76	6.0	3	18	2	1.98	1.64	3.54	0.69	140 ± 10
	Median																131
	Weighted Average Age																132.9 ± 9.3
	DCE-38	#1	5.428	0.001	17.8	0.2	0.011106	0.31	6.0	3	16	1	1.96	1.63	2.07	0.91	151 ± 9
		#2	4.319	0.001	14.0	0.3	0.000957	0.34	1.0	2	2	2	1.96	1.63	2.07	0.91	120 ± 8
		#3	5.459	0.001	16.7	0.4	0.001142	0.44	2.0	3	2	2	1.96	1.63	2.07	0.91	140 ± 10
	Median																140
	Weighted Average Age																146.0 ± 9.5
	DCE-39	#1	5.162	0.001	15.5	0.2	0.006418	0.31	5.0	3	11	1	2.15	1.78	3.04	0.31	121 ± 8
		#2	4.000	0.001	17.3	0.5	0.003050	0.60	1.0	1	5	2	2.15	1.78	3.04	0.31	130 ± 10
		#3	5.629	0.001	11.7	0.3	0.001633	0.38	4.0	6	4	2	2.15	1.78	3.04	0.31	92 ± 7
	Median																121
	Weighted Average Age																125.2 ± 8.9
	DCE-40	#1	4.822	0.001	15.1	0.4	0.005621	0.60	4.0	3	10	2	1.93	1.6	3.16	0.56	130 ± 10
		#2	4.344	0.001	15.8	0.3	0.001637	0.33	2.0	2	3	1	1.93	1.6	3.16	0.56	137 ± 9
		#3	4.552	0.001	16.5	0.3	0.001128	0.34	0.0	30	2	2	1.93	1.6	3.16	0.56	140 ± 10
	Median																137
	Weighted Average Age																135.8 ± 9.6
	DCE-41	#1	5.842	0.001	8.6	0.3	0.010123	0.82	7.0	5	26	2	0.68	0.56	1.45	0.31	210 ± 20
		#2	5.343	0.001	6.8	0.3	0.003708	0.72	4.0	4	14	3	0.68	0.56	1.45	0.31	170 ± 10
		#3	5.678	0.005	9.0	0.2	0.003350	0.30	4.0	3	10	1	0.68	0.56	1.45	0.31	220 ± 20
	Median																210
	Weighted Average Age																215.1 ± 20
	DCE-43	#1	4.887	0.001	12.5	0.3	0.000855	0.34	0.0	10	2	2	1.79	1.49	3.17	0.81	117 ± 8
		#2	5.317	0.001	9.2	0.3	0.000311	0.33	1.0	2	1	3	1.79	1.49	3.17	0.81	86 ± 7
		#3	5.051	0.001	11.3	0.2	0.001992	0.25	5.0	9	5	1	1.79	1.49	3.17	0.81	106 ± 7
	Median																106
	Weighted Average Age																111.4 ± 7.5
	DCE-44	#1	5.542	0.001	9.1	0.2	0.007621	0.40	5.0	3	20	1	0.64	0.53	1.36	0.37	230 ± 20
		#2	5.574	0.001	12.0	0.3	0.001243	0.36	3.0	5	3	2	0.64	0.53	1.36	0.37	300 ± 20
		#3	5.661	0.001	9.9	0.3	0.001382	0.42	2.0	3	4	3	0.64	0.53	1.36	0.37	250 ± 20
		#4	5.918	0.001	11.0	0.2	0.002774	0.27	20.0	50	7	1	0.64	0.53	1.36	0.37	280 ± 20
		#5	6.423	0.001	8.7	0.3	0.001534	0.40	10.0	30	5	2	0.64	0.53	1.36	0.37	220 ± 20
	Median																250
	Weighted Average Age																234.0 ± 20.0
	DCE-45	#1	5.233	0.001	8.5	0.2	0.003164	0.40	2.0	1	10	2	0.89	0.74	1.37	0.88	160 ± 10
		#2	5.909	0.001	8.1	0.2	0.000839	0.26	0.0	40	3	2	0.89	0.74	1.37	0.88	150 ± 10
		#3	4.482	0.001	8.5	0.4	0.000000	0.40	0.0	1	0	4	0.89	0.74	1.37	0.88	160 ± 20
	Median																160
	Weighted Average Age																156.2 ± 12.1
	DCE-46	#1	3.478	0.001	25.6	0.5	0.018826	0.68	6.0	2	18	1	3.19	2.6	2.23	0.53	136 ± 8
		#2	2.828	0.002	14.4	0.6	0.005360	0.90	0.0	100	10	3	3.19	2.6	2.23	0.53	75 ± 6
		#3	3.643	0.001	18.9	0.3	0.004041	0.36	5.0	8	6	1	3.19	2.6	2.23	0.53	98 ± 5
		#4	3.143	0.001	15.7	0.4	0.006501	0.62	10.0	20	11	2	3.19	2.6	2.23	0.53	84 ± 6
		#5	3.212	0.001	17.9	0.5	0.005214	0.66	4.0	3	8	2	3.19	2.6	2.23	0.53	95 ± 7
	Median																95
	Weighted Average Age																93.0 ± 5.9
	DCE-47	#1	6.044	0.001	4.5	0.4	0.003088	1.42	3.0	3	17	6	0.94	0.78	1.15	0.72	80 ± 10
		#2	5.663	0.001	3.8	0.2	0.002986	1.15	20.0	40	19	5	0.94	0.78	1.15	0.72	69 ± 8
		#3	6.261	0.001	1.1	0.2	0.001579	3.20	3.0	4	30	10	0.94	0.78	1.15	0.72	20 ± 4
	Median																69
	Weighted Average Age																n.c.
	DCE-48	#1	5.578	0.001	4.3	0.3	0.000919	0.66	2.0	5	6	6	1.04	0.86	1.3	0.83	71 ± 8
		#2	6.136	0.001	2.8	0.2	0.000816	0.76	0.0	10	8	7	1.04	0.86	1.3	0.83	46 ± 6
		#3	7.237	0.001	4.6	0.3	0.000811	0.60	3.0	7	5	6	1.04	0.86	1.3	0.83	76 ± 8
	Median																71
	Weighted Average Age																n.c.
	DCE-49	#1	3.761	0.001	13.5	0.5	0.004473	0.77	6.0	9	9	3	1.78	1.48	3.5	1.4	130 ± 10
		#2	5.082	0.001	12.8	0.5	0.002257	0.65	3.0	3	5	3	1.78	1.48	3.5	1.4	120 ± 10
		#3	4.406	0.001	13.1	0.4	0.002310	0.55	2.0	2	5	3	1.78	1.48	3.5	1.4	120 ± 10
	Median																120
	Weighted Average Age																123.5 ± 10
	DCE-50	#1	4.761	0.001	15.3	0.3	0.009045	0.45	6.0	5	15	1	2.25	1.87	2.75	0.79	114 ± 8
		#2	4.505	0.001	17.5	0.4	0.005098	0.56	0.0	400000	8	2	2.25	1.87	2.75	0.79	130 ± 9
		#3	4.576	0.001	10.9	0.3	0.010299	0.74	8.0	4	22	2	2.25	1.87	2.75	0.79	82 ± 6
	Median																114
	Weighted Average Age																n.c.
	DCE-52	#1	5.393	0.001	9.5	0.4	0.000984	0.52	0.0	400	3	4	1.99	1.65	3.01	0.72	81 ± 8
		#2	6.168	0.001	10.0	0.2	0.001036	0.26	3.0	6	3	2	1.99	1.65	3.01	0.72	85 ± 6
		#3	5.106	0.001	13.1	0.3	0.001829	0.38	3.0	6	4	2	1.99	1.65	3.01	0.72	111 ± 8
	Median																85
	Weighted Average Age																83.3 ± 6.8
	DCE-55	#1	5.822	0.001	7.4	0.2	0.001305	0.30	10.0	20	5	2	0.78	0.65	1.16	0.63	160 ± 10
		#2	6.205	0.001	8.1	0.2	0.001732	0.32	4.0	6	6	2	0.78	0.65	1.16	0.63	170 ± 10
		#3	6.281	0.001	7.1	0.3	0.000991	0.42	2.0	2	4	3	0.78	0.65	1.16	0.63	150 ± 10
	Median																160
	Weighted Average Age																160.4 ± 10
	DCE-57	#1	5.579	0.001	6.0	0.2	0.000410	0.26	0.0	20	2	3	0.67	0.56	1.25	0.18	150 ± 10
		#2	6.491	0.001	6.7	0.1	0.000935	0.14	10.0	20	4	1	0.67	0.56	1.25	0.18	160 ± 10
		#3	5.404	0.001	7.2	0.3	0.001005	0.42	2.0	4	4	3	0.67	0.56	1.25	0.18	180 ± 20
	Median																160
	Weighted Average Age																160.8 ± 12.3
	DCE-58	#1	6.835	0.001	9.3	0.2	0.001298	0.24	3.0	3	4	1	0.86	0.71	1.16	0.28	180 ± 10
		#2	6.261	0.001	8.4	0.4	0.001481	0.55	3.0	6	5	3	0.86	0.71	1.16	0.28	160 ± 20
		#3	6.733	0.001	9.4	0.3	0.001312	0.38	3.0	3	4	2	0.86	0.71	1.16	0.28	180 ± 10
	Median																180
	Weighted Average Age																176.4 ± 11.8
	DCE-59	#1	6.333	0.001	6.6	0.3	0.001164	0.50	3.0	8	5	4	0.55	0.46	1.16	0.2	200 ± 20
		#2	5.440	0.001	5.3	0.2	0.001133	0.38	0.0	10	6	3	0.55	0.46	1.16	0.2	160 ± 10
		#3	5.700	0.001	5.7	0.3	0.001437	0.58	0.0	10	7	4	0.55	0.46	1.16	0.2	170 ± 10
	Median																170
	Weighted Average Age																165.2 ± 10
	DCE-60	#1	5.509	0.001	5.4	0.2	0.002010	0.50	4.0	5	10	3	0.51	0.42	1.13	0.56	180 ± 20
		#2	6.602	0.001	5.4	0.2	0.002703	0.46	10.0	10	13	2	0.51	0.42	1.13	0.56	180 ± 10
		#3	6.562	0.001	5.3	0.1	0.002421	0.34	5.0	8	12	2	0.51	0.42	1.13	0.56	170 ± 10
	Median																180
	Weighted Average Age																176.1 ± 12
	DCE-61	#1	5.075	0.001	6.3	0.2	0.002609	0.53	3.0	2	11	3	0.66	0.55	1.15	0.48	160 ± 10
		#2	5.404	0.001	7.1	0.2	0.002352	0.38	4.0	3	9	2	0.66	0.55	1.15	0.48	180 ± 10
		#3	6.813	0.001	7.0	0.1	0.002898	0.21	3.0	2	11	1	0.66	0.55	1.15	0.48	170 ± 10
	Median																170
	Weighted Average Age																170.4 ± 10
	DCE-62	#1	6.488	0.001	9.9	0.2	0.003685	0.40	3.0	1	10	2	0.76	0.63	1.16	0.14	210 ± 10
		#2	7.340	0.001	8.8	0.1	0.002219	0.17	10.0	10	7	1	0.76	0.63	1.16	0.14	190 ± 10
		#3	5.790	0.001	10.6	0.2	0.002673	0.34	3.0	2	7	2	0.76	0.63	1.16	0.14	230 ± 10
	Median																210
	Weighted Average Age																200.5 ± 10
	DCE-63	#1	5.150	0.001	15.7	0.3	0.003357	0.36	6.0	6	6	1	2.1	1.74	3	0.79	126 ± 9
		#2	4.922	0.001	15.7	0.3	0.003357	0.36	6.0	7	6	1	2.1	1.74	3	0.79	126 ± 8
		#3	5.907	0.001	15.6	0.2	0.003934	0.27	10.0	10	7	1	2.1	1.74	3	0.79	125 ± 8
	Median																126
	Weighted Average Age																125.7 ± 8.3
	DCE-64	#1	4.938	0.001	18.4	0.2	0.003313	0.24	5.0	4	5	1	2.18	1.81	3.06	1.59	141 ± 9
		#2	4.987	0.001	15.7	0.3	0.002192	0.38	4.0	8	4	2	2.18	1.81	3.06	1.59	121 ± 8
		#3	5.866	0.001	27.0	0.4	0.004262	0.44	10.0	10	5	1	2.18	1.81	3.06	1.59	200 ± 10
	Median																141
	Weighted Average Age																131.2 ± 8.5
	DCE-65	#1	5.607	0.001	15.6	0.2	0.002291	0.24	3.0	4	4	1	1.91	1.59	2.9	1.12	136 ± 8
		#2	3.987	0.001	16.7	0.4	0.002945	0.45	10.0	20	5	1	1.91	1.59	2.9	1.12	150 ± 10
		#3	4.926	0.001	16.7	0.3	0.002883	0.34	3.0	2	5	1	1.91	1.59	2.9	1.12	140 ± 10
	Median																140
	Weighted Average Age																141.8 ± 9.3
	DCE-66	#1	5.383	0.001	13.5	0.3	0.002887	0.42	2.0	2	6	2	2.21	1.83	2.9	1.23	170 ± 10
		#2	6.133	0.001	13.8	0.4	0.002951	0.52	4.0	3	6	2	2.21	1.83	2.9	1.23	106 ± 8
		#3	5.338	0.001	11.8	0.3	0.003437	0.46	0.0	200	8	2	2.21	1.83	2.9	1.23	90 ± 7
	Median																106
	Weighted Average Age																n.c.
	DCE-67	#1	4.641	0.001	14.0	0.5	0.001451	0.59	0.0	10	3	3	1.93	1.6	2.93	1.01	120 ± 10
		#2	4.227	0.001	10.7	0.4	0.001109	0.46	1.0	1	3	2	1.93	1.6	2.93	1.01	94 ± 8
		#3	4.583	0.001	13.2	0.4	0.001368	0.46	0.0	6000	3	2	1.93	1.6	2.93	1.01	116 ± 9
	Median																116
	Weighted Average Age																117.9 ± 9.5
	DCE-68	#1	6.435	0.001	2.9	0.2	0.000845	0.68	2.0	3	8	6	0.6	0.5	1.43	0.5	80 ± 10
		#2	6.805	0.001	3.6	0.3	0.001340	1.00	2.0	3	10	7	0.6	0.5	1.43	0.5	100 ± 10
		#3	5.840	0.001	4.3	0.3	0.001084	0.72	10.0	40	7	6	0.6	0.5	1.43	0.5	120 ± 20
	Median																100
	Weighted Average Age																107.5 ± 13.8
	DCE-70	#1	5.266	0.001	0.8	0.2	0.001787	8.20	10.0	20	40	20	1.03	0.86	1.24	2.83	13 ± 4
		#2	5.491	0.001	1.6	0.3	0.003573	4.30	10.0	30	40	10	1.03	0.86	1.24	2.83	26 ± 6
		#3	6.223	0.001	1.2	0.2	0.001005	2.20	10.0	90	20	10	1.03	0.86	1.24	2.83	20 ± 5
	Median																20
	Weighted Average Age																20.3 ± 5.1
	DCE-72	#1	5.216	0.001	7.9	0.2	0.001393	0.30	3.0	3	5	2	1.06	0.88	1.24	0.97	125 ± 8
		#2	5.210	0.001	6.0	0.2	0.001058	0.35	2.0	5	5	3	1.06	0.88	1.24	0.97	95 ± 8
		#3	5.828	0.001	6.1	0.3	0.001777	0.54	0.0	300	8	3	1.06	0.88	1.24	0.97	97 ± 9
	Median																97
	Weighted Average Age																96 ± 8.5
	DCE-73	#1	5.032	0.001	7.4	0.4	0.001582	0.70	10.0	90	6	5	1.33	1.1	1.42	1.11	90 ± 10
		#2	6.935	0.001	8.9	0.3	0.001569	0.40	2.0	3	5	2	1.33	1.1	1.42	1.11	110 ± 10
		#3	5.631	0.001	3.4	0.3	0.000990	0.78	1.0	2	8	6	1.33	1.1	1.42	1.11	44 ± 6
	Median																90
	Weighted Average Age																101 ± 10
	DCE-74	#1	5.542	0.001	6.5	0.3	0.004460	0.81	7.0	8	17	3	1.45	1.2	1.5	0.99	77 ± 7
		#2	6.617	0.001	2.6	0.3	0.001077	1.29	1.0	2	11	9	1.45	1.2	1.5	0.99	31 ± 5
		#3	6.095	0.001	6.1	0.3	0.002271	0.70	0.0	1000	10	4	1.45	1.2	1.5	0.99	72 ± 7
	Median																72
	Weighted Average Age																74.6 ± 7
	DCE-75	#1	5.868	0.001	1.0	0.2	0.002328	3.48	10.0	10	41	8	1.08	0.9	1.22	0.77	17 ± 3
		#2	4.999	0.001	3.1	0.2	0.003462	1.70	10.0	20	25	6	1.08	0.9	1.22	0.77	49 ± 7
		#3	5.999	0.001	2.8	0.1	0.005509	1.21	10.0	20	37	3	1.08	0.9	1.22	0.77	45 ± 4
	Median																45
	Weighted Average Age																46.5 ± 5.2
	DCE-77	#1	5.665	0.001	3.4	0.2	0.001408	0.64	3.0	4	11	4	1	0.83	1.4	0.9	57 ± 5
		#2	6.886	0.001	2.7	0.2	0.001233	1.04	3.0	7	12	7	1	0.83	1.4	0.9	46 ± 6
		#3	6.844	0.001	2.4	0.3	0.000893	1.30	2.0	5	10	10	1	0.83	1.4	0.9	42 ± 7
	Median																46
	Weighted Average Age																52.6 ± 5.4
	DCE-79	#1	5.606	0.001	2.9	0.2	0.003238	1.20	6.0	7	25	4	0.72	0.6	1.33	0.82	69 ± 8
		#2	5.723	0.001	3.9	0.2	0.001782	0.68	10.0	20	12	4	0.72	0.6	1.33	0.82	90 ± 10
		#3	6.116	0.002	3.6	0.2	0.003206	0.83	3.0	2	21	3	0.72	0.6	1.33	0.82	86 ± 9
	Median																86
	Weighted Average Age																87.9 ± 9.5
	DCE-86	#1	6.310	0.001	3.9	0.2	0.013065	1.70	5.0	1	50	3	1.22	1.01	1.74	0.88	55 ± 6
		#2	6.440	0.001	13.3	0.3	0.004951	0.40	10.0	20	10	1	1.22	1.01	1.74	0.88	180 ± 10
		#3	6.912	0.001	9.5	0.2	0.006519	0.37	7.0	4	17	1	1.22	1.01	1.74	0.88	131 ± 9
	Median																131
	Weighted Average Age																n.c.
	DPI-01	#1	5.243	0.001	13.2	0.3	0.013209	0.53	4.0	1	23	1	2.21	1.83	3.02	2.94	101 ± 7
		#2	3.619	0.001	22.5	0.4	0.000761	0.41	2.0	5	1	1	2.21	1.83	3.02	2.94	170 ± 10
		#3	5.497	0.001	18.5	0.3	0.001983	0.33	10.0	20	3	1	2.21	1.83	3.02	2.94	240 ± 20
		#4	6.198	0.002	15.0	0.2	0.002094	0.24	5.0	6	4	1	2.21	1.83	3.02	2.94	200 ± 10
		#5	5.870	0.001	15.9	0.3	0.002803	0.35	5.0	9	5	1	2.21	1.83	3.02	2.94	210 ± 10
	Median																200
	Weighted Average Age																n.c.
	DPI-02	#1	4.568	0.001	12.1	0.4	0.001689	0.52	10.0	50	4	3	1.02	0.85	1.35	1.53	190 ± 10
		#2	4.616	0.001	11.1	0.3	0.001150	0.36	1.0	2	3	2	1.02	0.85	1.35	1.53	180 ± 10
		#3	5.620	0.001	11.8	0.2	0.001647	0.28	4.0	8	4	2	1.02	0.85	1.35	1.53	190 ± 10
	Median																190
	Weighted Average Age																186.8 ± 10
	DPI-03	#1	4.771	0.001	9.9	0.4	0.005399	0.82	20.0	60	14	3	0.85	0.71	1.40	1.19	190 ± 20
		#2	5.695	0.003	10.2	0.2	0.007501	0.38	5.0	3	18	1	0.85	0.71	1.40	1.19	200 ± 10
		#3	5.831	0.001	8.6	0.4	0.004305	0.92	3.0	2	13	4	0.85	0.71	1.40	1.19	170 ± 20
	Median																190
	Weighted Average Age																190.8 ± 14.7
	DPI-04	#1	5.448	0.001	11.2	0.3	0.007685	0.64	4.0	1	17	2	0.87	0.72	1.42	1.10	210 ± 20
		#2	4.929	0.001	12.0	0.3	0.002116	0.40	4.0	5	5	2	0.87	0.72	1.42	1.10	230 ± 20
		#3	4.672	0.001	10.6	0.4	0.002267	0.58	2.0	2	6	3	0.87	0.72	1.42	1.10	200 ± 20
	Median																210
	Weighted Average Age																214.1 ± 20
	DPI-05	#1	5.561	0.001	15.3	0.3	0.004457	0.46	5.0	4	8	2	1.3	1.08	1.4	1.01	190 ± 10
		#2	6.330	0.001	15.5	0.2	0.002906	0.25	5.0	5	5	1	1.3	1.08	1.4	1.01	200 ± 10
		#3	5.294	0.001	15.2	0.3	0.001575	0.33	2.0	2	3	1	1.3	1.08	1.4	1.01	190 ± 10
	Median																190
	Weighted Average Age																193.4 ± 10
	DPI-06	#1	5.243	0.001	12.7	0.3	0.009980	0.49	5.0	3	19	1	1.93	1.6	3.13	0.66	111 ± 8
		#2	5.724	0.001	13.9	0.2	0.002972	0.26	10.0	10	6	1	1.93	1.6	3.13	0.66	121 ± 8
		#3	4.561	0.001	13.9	0.3	0.001940	0.38	2.0	3	4	2	1.93	1.6	3.13	0.66	121 ± 9
	Median																121
	Weighted Average Age																117.7 ± 8.3
	DPI-07	#1	4.889	0.001	16.4	0.3	0.011253	0.47	6.0	3	17	1	2.26	1.88	3.09	0.70	122 ± 7
		#2	4.646	0.001	14.3	0.3	0.003058	0.42	3.0	2	6	2	2.26	1.88	3.09	0.70	107 ± 7
		#3	5.044	0.001	18.1	0.3	0.001875	0.36	10.0	10	3	2	2.26	1.88	3.09	0.70	134 ± 9
	Median																122
	Weighted Average Age																127.5 ± 7.9
	DPI-08	#1	5.877	0.001	12.0	0.2	0.002116	0.25	10.0	40	5	1	1.99	1.65	2.95	1.45	102 ± 7
		#2	6.670	0.002	15.3	0.2	0.000103	0.20	0.0	2	0	1	1.99	1.65	2.95	1.45	129 ± 8
		#3	5.639	0.002	14.5	0.2	0.001502	0.23	10.0	20	3	1	1.99	1.65	2.95	1.45	123 ± 7
	Median																123
	Weighted Average Age																125.9 ± 7.5
	DPI-09	#1	5.223	0.001	11.8	0.5	0.004886	0.83	3.0	2	11	3	2.13	1.77	3.02	0.96	93 ± 8
		#2	3.996	0.001	14.5	0.2	0.000991	0.22	1.0	2	2	1	2.13	1.77	3.02	0.96	114 ± 7
		#3	4.442	0.001	16.8	0.3	0.000568	0.32	0.0	5	1	2	2.13	1.77	3.02	0.96	132 ± 9
		#4	4.632	0.001	11.0	0.3	0.000752	0.34	0.0	10	2	2	2.13	1.77	3.02	0.96	87 ± 7
		#5	4.629	0.001	14.9	0.2	0.001544	0.23	2.0	3	3	1	2.13	1.77	3.02	0.96	117 ± 8
	Median																114
	Weighted Average Age																n.c.
	DPI-10A	#1	3.935	0.001	17.0	0.3	0.014238	0.50	5.0	2	20	1	2.27	1.88	2.82	1.5	126 ± 8
		#2	4.517	0.001	15.5	0.3	0.002733	0.35	10.0	10	5	1	2.27	1.88	2.82	1.5	115 ± 7
		#3	5.343	0.001	15.6	0.3	0.002178	0.34	0.0	20000	4	1	2.27	1.88	2.82	1.5	116 ± 7
	Median																116
	Weighted Average Age																118.9 ± 7.3
	DPI-11	#1	4.741	0.001	14.2	0.3	0.005880	0.52	4.0	3	11	2	1.93	1.6	3.17	1.54	123 ± 9
		#2	5.122	0.001	14.3	0.3	0.000484	0.32	1.0	1	1	2	1.93	1.6	3.17	1.54	125 ± 9
		#3	4.881	0.002	14.3	0.3	0.000978	0.34	0.0	800	2	2	1.93	1.6	3.17	1.54	124 ± 9
	Median																124
	Weighted Average Age																124 ± 9
	DPI-12	#1	4.274	0.001	20.0	0.5	0.003526	0.60	10.0	20	5	2	2.09	1.73	3.06	1.01	160 ± 10
		#2	4.406	0.002	19.9	0.3	0.001015	0.31	0.0	20	2	1	2.09	1.73	3.06	1.01	160 ± 10
		#3	4.974	0.001	14.5	0.2	0.000991	0.22	3.0	7	2	1	2.09	1.73	3.06	1.01	117 ± 8
		#4	4.483	0.001	24.0	0.4	0.000812	0.41	0.0	20	1	1	2.09	1.73	3.06	1.01	190 ± 10
		#5	4.896	0.001	17.9	0.4	0.001224	0.44	2.0	4	2	2	2.09	1.73	3.06	1.01	140 ± 10
	Median																160
	Weighted Average Age																153.9 ± 10
	DPI-13	#1	6.171	0.001	15.9	0.3	0.008671	0.44	4.0	1	14	1	2.38	2.00	2.96	1.41	111 ± 8
		#2	4.860	0.001	19.5	0.4	0.000660	0.41	1.0	2	1	1	2.38	2.00	2.96	1.41	136 ± 9
		#3	4.278	0.001	15.2	0.3	0.000514	0.31	1.0	3	1	1	2.38	2.00	2.96	1.41	107 ± 7
	Median																111
	Weighted Average Age																108.9 ± 7.5
	DPI-14	#1	4.868	0.001	31.8	0.4	0.007773	0.45	5.0	3	7	1	3.67	3.10	3.05	1.29	140 ± 10
		#2	5.326	0.001	27.1	0.4	0.001853	0.42	1.0	2	2	1	3.67	3.10	3.05	1.29	120 ± 10
		#3	4.886	0.002	23.8	0.3	0.000805	0.31	1.0	3	1	0.8	3.67	3.10	3.05	1.29	107 ± 8
	Median																120
	Weighted Average Age																130.8 ± 10
	DPI-15	#1	4.908	0.001	20.2	0.3	0.010112	0.43	5.0	3	13	1	3.05	2.50	2.49	1.31	113 ± 6
		#2	4.339	0.001	20.2	0.4	0.006693	0.49	5.0	4	9	1	3.05	2.50	2.49	1.31	113 ± 7
		#3	5.171	0.001	17.5	0.3	0.007995	0.42	6.0	4	12	1	3.05	2.50	2.49	1.31	98 ± 5
	Median																113
	Weighted Average Age																113 ± 6.5
	DPI-16	#1	4.586	0.006	16.0	0.2	0.005431	0.27	3.0	1	9.2	0.8	2.08	1.73	3.32	1.27	129 ± 8
		#2	4.851	0.001	14.1	0.3	0.000000	0.30	0.0	100	0	2	2.08	1.73	3.32	1.27	114 ± 8
		#3	5.293	0.001	13.6	0.3	0.000460	0.32	0.0	5	1	2	2.08	1.73	3.32	1.27	110 ± 8
	Median																114
	Weighted Average Age																122 ± 8
	DPI-17	#1	4.250	0.001	16.2	0.4	0.005367	0.58	6.0	9	9	2	2.37	2.00	3.34	1.3	113 ± 8
		#2	5.364	0.001	20.4	0.4	0.000690	0.41	2.0	5	1	1	2.37	2.00	3.34	1.3	141 ± 9
		#3	4.776	0.001	17.4	0.3	0.001190	0.32	2.0	6	2	1	2.37	2.00	3.34	1.3	121 ± 8
	Median																121
	Weighted Average Age																117.1 ± 8
	DPI-18	#1	4.593	0.001	14.9	0.4	0.001019	0.44	2.0	5	2	2	1.76	1.46	3.48	0.8	140 ± 10
		#2	3.612	0.001	13.2	0.4	0.001368	0.46	2.0	4	3	2	1.76	1.46	3.48	0.8	126 ± 9
		#3	4.719	0.001	12.5	0.3	0.000855	0.34	2.0	4	2	2	1.76	1.46	3.48	0.8	119 ± 8
		#4	4.617	0.001	15.8	0.5	0.002205	0.58	2.0	4	4	2	1.76	1.46	3.48	0.8	150 ± 10
		#5	5.533	0.001	11.2	0.3	0.001563	0.38	4.0	8	4	2	1.76	1.46	3.48	0.8	107 ± 8
	Median																126
	Weighted Average Age																n.c.
	DPI-19	#1	4.994	0.001	16.0	0.3	0.004661	0.38	4.0	3	8	1	2.1	1.74	3.36	0.98	128 ± 9
		#2	5.168	0.001	9.9	0.4	0.000677	0.46	1.0	4	2	3	2.1	1.74	3.36	0.98	81 ± 7
		#3	4.694	0.001	16.4	0.3	0.001121	0.32	0.0	20	2	1	2.1	1.74	3.36	0.98	131 ± 9
	Median																128
	Weighted Average Age																129.5 ± 9
	DPI-20	#1	5.181	0.002	20.6	0.4	0.004405	0.46	4.0	2	6	1	2.49	2.10	2.70	1.54	136 ± 8
		#2	5.060	0.001	21.6	0.3	0.001177	0.31	0.0	100	2	1	2.49	2.10	2.70	1.54	143 ± 9
		#3	5.050	0.001	18.4	0.2	0.000623	0.21	2.0	8	1	1	2.49	2.10	2.70	1.54	122 ± 7
	Median																136
	Weighted Average Age																128.9 ± 7.5
	DPI-21	#1	4.216	0.002	16.8	0.4	0.006253	0.60	4.0	4	10	2	2.15	1.78	3.33	1.28	130 ± 10
		#2	5.088	0.001	18.5	0.3	0.000626	0.31	2.0	6	1	1	2.15	1.78	3.33	1.28	144 ± 9
		#3	4.771	0.001	13.1	0.3	0.000443	0.32	1.0	5	1	2	2.15	1.78	3.33	1.28	103 ± 8
		#4	4.108	0.001	15.3	0.3	0.000518	0.32	0.0	10	1	2	2.15	1.78	3.33	1.28	120 ± 8
		#5	5.326	0.001	14.8	0.3	0.001012	0.32	0.0	10	2	1	2.15	1.78	3.33	1.28	116 ± 8
	Median																120
	Weighted Average Age																121.7 ± 8.6
	DPI-22	#1	4.720	0.001	16.4	0.2	0.007492	0.31	4.0	2	12	1	2.09	1.73	3.22	1.33	132 ± 9
		#2	4.864	0.001	14.3	0.3	0.000000	0.30	1.0	2	0	1	2.09	1.73	3.22	1.33	116 ± 8
		#3	5.383	0.001	18.5	0.3	0.000626	0.31	0.4	0.7	1	1	2.09	1.73	3.22	1.33	150 ± 10
		#4	5.092	0.001	17.0	0.2	0.000286	0.20	0.4	0.9	1	1	2.09	1.73	3.22	1.33	136 ± 9
		#5	4.565	0.001	14.5	0.3	0.000991	0.32	1.0	1	2	1	2.09	1.73	3.22	1.33	117 ± 8
	Median																132
	Weighted Average Age																139.4 ± 9.3
	DPI-23	#1	5.198	0.002	12.5	0.3	0.003641	0.46	10.0	30	8	2	1.7	1.38	3.7	0.8	130 ± 10
		#2	5.748	0.001	10.6	0.2	0.000725	0.22	0.0	80	2	1	1.7	1.38	3.7	0.8	107 ± 7
		#3	5.349	0.002	11.8	0.3	0.001223	0.36	3.0	9	3	2	1.7	1.38	3.7	0.8	119 ± 8
	Median																119
	Weighted Average Age																124.1 ± 8.9
	DPI-24	#1	4.820	0.001	14.0	0.3	0.001451	0.33	4.0	8	3	1	1.9	1.54	3.5	0.8	127 ± 9
		#2	4.521	0.001	18.5	0.3	0.001265	0.32	0.0	40	2	1	1.9	1.54	3.5	0.8	170 ± 10
		#3	4.952	0.001	19.2	0.3	0.000650	0.31	0.0	100	1	1	1.9	1.54	3.5	0.8	170 ± 10
	Median																170
	Weighted Average Age																170 ± 10
	DPI-26	#1	4.403	0.001	17.7	0.4	0.002471	0.48	5.0	9	4	2	1.8	1.49	3.5	0.9	160 ± 10
		#2	4.783	0.001	10.4	0.2	0.003030	0.36	10.0	20	8	2	1.8	1.49	3.5	0.9	97 ± 6
		#3	4.722	0.001	15.6	0.3	0.003336	0.36	4.0	4	6	1	1.8	1.49	3.5	0.9	145 ± 9
	Median																145
	Weighted Average Age																152.5 ± 9.5
	DPI-27	#1	5.738	0.001	13.2	0.3	0.001368	0.33	3.0	4	3	1	2.3	1.9	2.9	1.1	97 ± 7
		#2	4.573	0.001	21.8	0.3	0.003043	0.34	10.0	10	4	1	2.3	1.9	2.9	1.1	160 ± 10
		#3	5.578	0.001	17.1	0.3	0.001772	0.36	10.0	70	3	2	2.3	1.9	2.9	1.1	124 ± 9
	Median																124
	Weighted Average Age																n.c.
	DPI-29	#1	4.390	0.001	16.8	0.3	0.002345	0.34	2.0	1	4	1	1.8	1.45	3.50	0.80	160 ± 10
		#2	5.224	0.001	16.8	0.2	0.002345	0.24	10.0	10	4	1	1.8	1.45	3.50	0.80	160 ± 10
		#3	4.546	0.001	16.9	0.3	0.001751	0.33	2.0	2	3	1	1.8	1.45	3.50	0.80	160 ± 10
	Median																160
	Weighted Average Age																160 ± 10
	DPI-35	#1	4.506	0.001	15.5	0.4	0.000525	0.42	1.0	3	1	2	2.3	1.90	2.90	1.00	112 ± 9
		#2	4.761	0.001	15.3	0.3	0.000518	0.32	0.0	30	1	2	2.3	1.90	2.90	1.00	111 ± 8
		#3	3.949	0.001	10.7	0.3	0.000732	0.34	3.0	7	2	2	2.3	1.90	2.90	1.00	78 ± 6
	Median																111
	Weighted Average Age																111.5 ± 8.5
	DPI-41	#1	5.684	0.001	12.0	0.3	0.003496	0.38	6.0	8	8	1	1.8	1.47	3.40	0.90	114 ± 8
		#2	5.419	0.001	15.9	0.4	0.001087	0.44	2.0	6	2	2	1.8	1.47	3.40	0.90	150 ± 10
		#3	4.482	0.002	19.8	0.4	0.001354	0.42	2.0	3	2	1	1.8	1.47	3.40	0.90	180 ± 10
	Median																150
	Weighted Average Age																n.c.
	DPI-49	#1	6.116	0.001	13.1	0.3	0.004876	0.40	5.0	5	10	1	1.02	0.85	1.29	3.19	210 ± 10
		#2	5.688	0.002	11.9	0.3	0.002098	0.35	10.0	30	5	1	1.02	0.85	1.29	3.19	190 ± 10
		#3	5.928	0.001	13.0	0.3	0.003787	0.38	5.0	5	8	1	1.02	0.85	1.29	3.19	210 ± 10
	Median																210
	Weighted Average Age																203.8 ± 10
	DPI-50	#1	5.520	0.001	11.8	0.2	0.009273	0.39	5.0	1	19	1	1.02	0.86	1.33	2.18	190 ± 10
		#2	6.301	0.001	13.0	0.3	0.007685	0.45	5.0	2	15	1	1.02	0.86	1.33	2.18	210 ± 10
		#3	5.518	0.001	13.7	0.5	0.008742	0.82	5.0	4	16	2	1.02	0.86	1.33	2.18	220 ± 20
	Median																210
	Weighted Average Age																204.7 ± 12.2
	DPI-51	#1	6.232	0.001	10.0	0.2	0.001763	0.25	10.0	10	5	1	1.60	1.29	3.40	0.57	108 ± 7
		#2	4.769	0.001	14.0	0.4	0.000957	0.44	2.0	3	2	2	1.60	1.29	3.40	0.57	150 ± 10
		#3	4.839	0.001	12.7	0.3	0.000430	0.32	0.0	100	1	2	1.60	1.29	3.40	0.57	140 ± 10
	Median																140
	Weighted Average Age																145.2 ± 10
n.c. - non-concordant samples, no age was calculated
